# Supplementary figures and images for: In silico design and characterization of an ISG75-derived chimeric protein from Trypanosoma evansi: a potential vaccine candidate
Source: Research Square preprint supplement (doi:10.21203/rs.3.rs-6046924/v1), 2025-02-20

A)


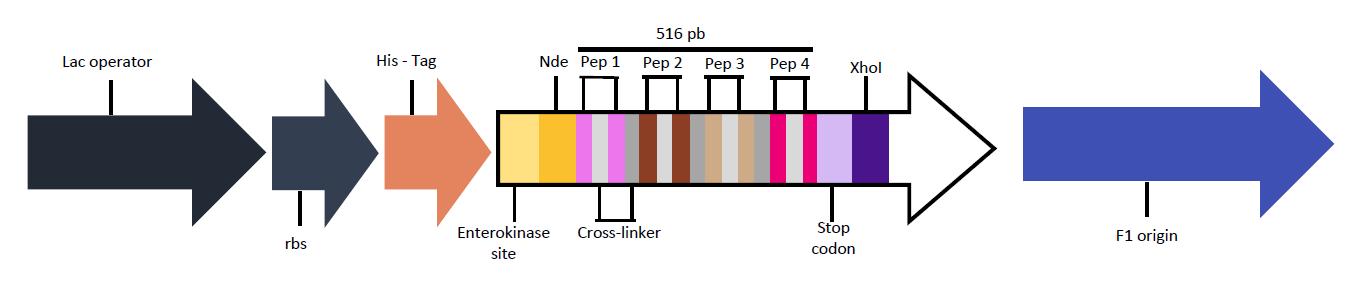


Supplementary Figure 1

Supplement: Supplementary file 1 [file 9fda4fe0f73375f1e116a555.docx]
